# Supplementary material
Source: PubMed Central journal article supplement (PMC7845158)
Supplement: giaa163_reviewer_1_report_revision_1.pdf [file giaa163_reviewer_1_report_revision_1.pdf]

## Reviewer Report

**Title:** Transcriptome annotation in the cloud: complexity, best practices and cost.

**Version:** Revision 1      **Date:** 12/4/2020

**Reviewer name:** Tazro Ohta

### Reviewer Comments to Author:

I appreciate the authors' responses to the reviewer comments and their improvements in the manuscript. Overall, I do not find any further critical issues to be solved in the content. Below are a few minor suggestions:

#### 1. Pricing of cloud usage:

Both AWS and GCP officially announces that they continue their efforts to reduce the computing cost regularly. It would be better to mention that the pricing of cloud instances may change in the future as well as the instance selections, and that may lead to the change of the study's conclusion. Table 1 also should have information about the date and the region.

#### 2. The container image registry

In the experiments with both vendors, the authors used the same docker image hosted in the Google Container Registry. It means that the GCP has an advantage in the transfer of the container image, which may take some time during the instance setup. It would be fair to mention it or mention that the pulling time too short to be worth consideration.

I am looking forward to the publication of this manuscript, which may give many insights into practical cloud usage to the readers.

Tazro Ohta

### Level of Interest

Please indicate how interesting you found the manuscript: Choose an item.

### Quality of Written English

Please indicate the quality of language in the manuscript: Choose an item.

### Declaration of Competing Interests

Please complete a declaration of competing interests, considering the following questions:

- Have you in the past five years received reimbursements, fees, funding, or salary from an organisation that may in any way gain or lose financially from the publication of this manuscript, either now or in the future?

- Do you hold any stocks or shares in an organisation that may in any way gain or lose financially from the publication of this manuscript, either now or in the future?
- Do you hold or are you currently applying for any patents relating to the content of the manuscript?
- Have you received reimbursements, fees, funding, or salary from an organization that holds or has applied for patents relating to the content of the manuscript?
- Do you have any other financial competing interests?
- Do you have any non-financial competing interests in relation to this paper?

If you can answer no to all of the above, write 'I declare that I have no competing interests' below. If your reply is yes to any, please give details below.

I declare that I have no competing interests

I agree to the open peer review policy of the journal. I understand that my name will be included on my report to the authors and, if the manuscript is accepted for publication, my named report including any attachments I upload will be posted on the website along with the authors' responses. I agree for my report to be made available under an Open Access Creative Commons CC-BY license (<http://creativecommons.org/licenses/by/4.0/>). I understand that any comments which I do not wish to be included in my named report can be included as confidential comments to the editors, which will not be published.

Choose an item.

To further support our reviewers, we have joined with Publons, where you can gain additional credit to further highlight your hard work (see: <https://publons.com/journal/530/gigascience>). On publication of this paper, your review will be automatically added to Publons, you can then choose whether or not to claim your Publons credit. I understand this statement.

Yes Choose an item.
